# Supplementary material for: Newly Formed Reticulated Platelets Undermine Pharmacokinetically Short-Lived Antiplatelet Therapies
Source: PubMed Central journal article supplement (PMC5405774; doi:10.1161/atvbaha.116.308763), 2017-03-02
Supplement: atv-37-949-s003.pdf [file atv-37-949-s003.pdf]

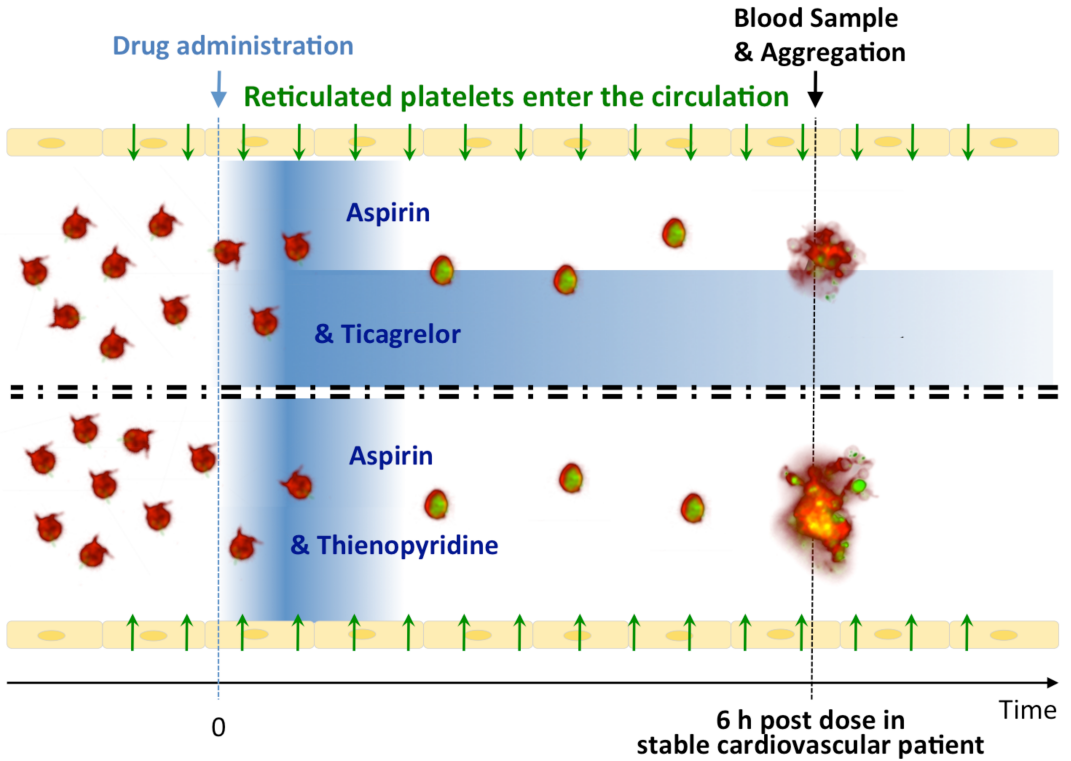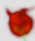

Non-reticulated platelet

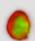

Reticulated platelet

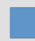

Active drug
